# Supplementary material
Source: HighWire-hosted journal article supplement (https://bmjopen.bmj.com/content/15/4/e094904)
Supplement: inline-supplementary-material-2 [file inline-supplementary-material-2.pdf]

Frame 3. Data extraction tool

| Data extraction tool                                                                                                                                                                                                                                                                                                                                                                                                                                                                                                                                                                                                  |                                                                                                                                                                                                                                                                                                                                                                                                                                                                                                                                                                                                        |
|-----------------------------------------------------------------------------------------------------------------------------------------------------------------------------------------------------------------------------------------------------------------------------------------------------------------------------------------------------------------------------------------------------------------------------------------------------------------------------------------------------------------------------------------------------------------------------------------------------------------------|--------------------------------------------------------------------------------------------------------------------------------------------------------------------------------------------------------------------------------------------------------------------------------------------------------------------------------------------------------------------------------------------------------------------------------------------------------------------------------------------------------------------------------------------------------------------------------------------------------|
| <b>Title</b><br>Implementation strategies by leaders and health professionals to improve the safety climate in the operating room: scoping review protocol                                                                                                                                                                                                                                                                                                                                                                                                                                                            |                                                                                                                                                                                                                                                                                                                                                                                                                                                                                                                                                                                                        |
| <b>Aim</b><br>To map improvement strategies used by health leaders and professionals to strengthen the safety climate in the operating room                                                                                                                                                                                                                                                                                                                                                                                                                                                                           |                                                                                                                                                                                                                                                                                                                                                                                                                                                                                                                                                                                                        |
| <b>Inclusion criteria</b><br><br>P- health professionals, leadership<br>C- improvement strategies to strengthen the safety climate<br>C- operating room                                                                                                                                                                                                                                                                                                                                                                                                                                                               | <b>Consider</b><br><br>P: Nurses, perfusionist nurses, anaesthesiologist nurses, nursing technicians, instrumentalists, room circulators, nursing residents, surgical doctors, anaesthesiologist doctors, medical residents of each speciality, support staff (administrative assistants, X-ray technicians, hygiene/cleaning staff, pharmacists and pharmacy technicians, pathologists, among others who assist and work exclusively in the operating theatre) unit leaders and management<br><br>C: Improvement strategies; Safety climate; Safety climate domains<br><br>C: hospital operating room |
| <b>Review question</b><br>What strategies do operating room leaders and professionals implement to improve the safety climate?                                                                                                                                                                                                                                                                                                                                                                                                                                                                                        |                                                                                                                                                                                                                                                                                                                                                                                                                                                                                                                                                                                                        |
| <b>Extracting details of the selected studies</b><br><b>(fill in the Excel® spreadsheet with this information)</b><br><br>1. Title; authors; year of publication and place of study:<br>2. Type of study:<br>3. Objectives:<br>4. Results:<br>5. Variables related to the implementation of improvement strategies to strengthen the safety climate and the items explored (safety climate, working conditions, management, stress, communication in the surgical environment, professional performance): Planning; Method used; Strategy used; Training of professionals and leadership; Implementation; Evaluation; |                                                                                                                                                                                                                                                                                                                                                                                                                                                                                                                                                                                                        |

Source: Adapted from the Joanna Briggs Institute Handbook, 2024
